# Supplementary material for: Lactobacillus helveticus SBT2171 Alleviates Perennial Allergic Rhinitis in Japanese Adults by Suppressing Eosinophils: A Randomized, Double-Blind, Placebo-Controlled Study
Source: PubMed Central journal article supplement (PMC7760906; doi:10.3390/nu12123620), 2020-11-25
Supplement: nutrients-12-03620-s001.pdf [file nutrients-12-03620-s001.pdf]

Table S1: CONSORT 2010 checklist of information to include when reporting a randomized trial.

| Section/Topic                    | Item No | Checklist item                                                                                                                                                                              | Reported on page No                   |
|----------------------------------|---------|---------------------------------------------------------------------------------------------------------------------------------------------------------------------------------------------|---------------------------------------|
| Title and abstract               | 1a      | Identification as a randomized trial in the title                                                                                                                                           | Title                                 |
|                                  | 1b      | Structured summary of trial design, methods, results, and conclusions (for specific guidance see CONSORT for abstracts)                                                                     | abstract                              |
| Introduction                     |         |                                                                                                                                                                                             |                                       |
| Background and objectives        | 2a      | Scientific background and explanation of rationale                                                                                                                                          | Introduction                          |
|                                  | 2b      | Specific objectives or hypotheses                                                                                                                                                           | Introduction                          |
| Methods                          |         |                                                                                                                                                                                             |                                       |
| Trial design                     | 3a      | Description of trial design (such as parallel, factorial) including allocation ratio.                                                                                                       | Trial design                          |
|                                  | 3b      | Important changes to methods after trial commencement (such as eligibility criteria), with reasons                                                                                          | N.A.                                  |
| Participants                     | 4a      | Eligibility criteria for participants                                                                                                                                                       | Participant                           |
|                                  | 4b      | Settings and locations where the data were collected                                                                                                                                        | Participant                           |
| Interventions                    | 5       | The interventions for each group with sufficient details to allow replication, including how and when they were actually administered                                                       | Intervention                          |
| Outcomes                         | 6a      | Completely defined pre-specified primary and secondary outcome measures, including how and when they were assessed                                                                          | Outcome                               |
|                                  | 6b      | Any changes to trial outcomes after the trial commenced, with reasons                                                                                                                       | N.A.                                  |
| Sample size                      | 7a      | How sample size was determined                                                                                                                                                              | Power analysis of sample size         |
|                                  | 7b      | When applicable, explanation of any interim analyses and stopping guidelines                                                                                                                | N.A.                                  |
| Randomization:                   |         |                                                                                                                                                                                             |                                       |
| Sequence generation              | 8a      | Method used to generate the random allocation sequence                                                                                                                                      | Selection, randomization and blinding |
|                                  | 8b      | Type of randomization; details of any restriction (such as blocking and block size)                                                                                                         | Selection, randomization and blinding |
| Allocation concealment mechanism | 9       | Mechanism used to implement the random allocation sequence (such as sequentially numbered containers), describing any steps taken to conceal the sequence until interventions were assigned | Selection, randomization and blinding |
| Implementation                   | 10      | Who generated the random allocation sequence, who enrolled participants, and who assigned participants to interventions                                                                     | Selection, randomization and blinding |

|                                                      |     |                                                                                                                                                   |                                       |
|------------------------------------------------------|-----|---------------------------------------------------------------------------------------------------------------------------------------------------|---------------------------------------|
| Blinding                                             | 11a | If done, who was blinded after assignment to interventions (for example, participants, care providers, those assessing outcomes) and how          | Selection, randomization and blinding |
|                                                      | 11b | If relevant, description of the similarity of interventions                                                                                       | N.A.                                  |
| Statistical methods                                  | 12a | Statistical methods used to compare groups for primary and secondary outcomes                                                                     | Statistics                            |
|                                                      | 12b | Methods for additional analyses, such as subgroup analyses and adjusted analyses                                                                  | Statistics                            |
| Results                                              |     |                                                                                                                                                   |                                       |
| Participant flow (a diagram is strongly recommended) | 13a | For each group, the numbers of participants who were randomly assigned, received intended treatment, and were analyzed for the primary outcome    | Study flow, Figure 1                  |
|                                                      | 13b | For each group, losses and exclusions after randomization, together with reasons                                                                  | Study flow, Figure 1                  |
| Recruitment                                          | 14a | Dates defining the periods of recruitment and follow-up                                                                                           | Recruitment                           |
|                                                      | 14b | Why the trial ended or was stopped                                                                                                                | N.A.                                  |
| Baseline data                                        | 15  | A table showing baseline demographic and clinical characteristics for each group                                                                  | Baseline data of subjects             |
| Numbers analyzed                                     | 16  | For each group, number of participants (denominator) included in each analysis and whether the analysis was by original assigned groups           | Study flow, Figure 1                  |
| Outcomes and estimation                              | 17a | For each primary and secondary outcome, results for each group, and the estimated effect size and its precision (such as 95% confidence interval) | Results                               |
|                                                      | 17b | For binary outcomes, presentation of both absolute and relative effect sizes is recommended                                                       | Results                               |
| Ancillary analyses                                   | 18  | Results of any other analyses performed, including subgroup analyses and adjusted analyses, distinguishing pre-specified from exploratory         | Stratified analyses                   |
| Harms                                                | 19  | All important harms or unintended effects in each group (for specific guidance see CONSORT for harms)                                             | Safety evaluation                     |
| Discussion                                           |     |                                                                                                                                                   |                                       |
| Limitations                                          | 20  | Trial limitations, addressing sources of potential bias, imprecision, and, if relevant, multiplicity of analyses                                  | Discussion                            |
| Generalisability                                     | 21  | Generalisability (external validity, applicability) of the trial findings                                                                         | Discussion                            |
| Interpretation                                       | 22  | Interpretation consistent with results, balancing benefits and harms, and considering other relevant evidence                                     | Discussion                            |
| Other information                                    |     |                                                                                                                                                   |                                       |
| Registration                                         | 23  | Registration number and name of trial registry                                                                                                    | Ethics                                |
| Protocol                                             | 24  | Where the full trial protocol can be accessed, if available                                                                                       | Ethics                                |
| Funding                                              | 25  | Sources of funding and other support (such as supply of drugs), role of funders                                                                   | Conflict of interest                  |

Table S2: Exclusion criteria.

|    |                                                                                                                                                                                                                                |
|----|--------------------------------------------------------------------------------------------------------------------------------------------------------------------------------------------------------------------------------|
| 1  | Individuals who visited a hospital or use a drug to treat perennial or seasonal allergic rhinitis (except the use of nose drops and eye drops of category 3 over-the-counter drug).                                            |
| 2  | Individuals who were treated with medicine.                                                                                                                                                                                    |
| 3  | Individuals who currently have or have a history of bronchial disease.                                                                                                                                                         |
| 4  | Individuals who currently have or have a history of mental disease, psychiatric disease, high blood pressure, diabetes, and hyperlipidemia.                                                                                    |
| 5  | Individuals who used an allergic related medicine to treat a disease in the past 1 month (except temporal usage).                                                                                                              |
| 6  | Individuals who have food allergy to ingredients of test food.                                                                                                                                                                 |
| 7  | Individuals who are sensitive to foods and medicines.                                                                                                                                                                          |
| 8  | Individuals who currently have or have a history of serious hepatopathy, kidney damage, heart disease, and blood disease.                                                                                                      |
| 9  | Individuals who currently have or have a history of endocrine disease.                                                                                                                                                         |
| 10 | Individuals whose BMI is over 30 kg/cm <sup>2</sup> .                                                                                                                                                                          |
| 11 | Individuals who donated blood over 200 mL in the past 1 month or over 400 mL in the past 3 months.                                                                                                                             |
| 12 | Individuals who have a habit of ingesting fermented milk food (over three times in a week).                                                                                                                                    |
| 13 | Individuals who could not restrict their ingestion of lactic acid bacteria-rich food after providing informed consent to participate in the study.                                                                             |
| 14 | Individuals who habitually ingest bifidobacteria-enriched food or food for specified health uses or foods with Function Claims to ease allergy symptoms in the past 1 month or will ingest these foods during the test period. |
| 15 | Individuals who excessively consume alcohol expressed in an amount of alcohol over 60 g/day.                                                                                                                                   |
| 16 | Individuals whose life style will change during the test period.                                                                                                                                                               |
| 17 | Individuals who currently are pregnant, are possibly pregnant, or are lactating.                                                                                                                                               |
| 18 | Individuals who participated in other clinical studies in the previous 3 months.                                                                                                                                               |
| 19 | Individuals who are or whose family member is an employee of a health food company.                                                                                                                                            |
| 20 | Individuals judged inappropriate for this study by the principal investigator.                                                                                                                                                 |

Table S3: Degree classification of local findings.

| Item                                    | Group   | n  | 0 week    | 4 week      | 8 week      | 12 week     | 16 week     |
|-----------------------------------------|---------|----|-----------|-------------|-------------|-------------|-------------|
| Swell of concha nasalis inferior mucosa | LH2171  | 93 | 2.3 ± 0.9 | 2.1 ± 0.7** | 2.1 ± 0.9** | 2.0 ± 0.8** | 2.0 ± 0.7** |
|                                         | Placebo | 94 | 2.4 ± 0.9 | 2.2 ± 0.7*  | 2.2 ± 0.8*  | 2.0 ± 0.8** | 2.1 ± 0.8** |
| Color of concha nasalis inferior mucosa | LH2171  | 93 | 2.7 ± 1.0 | 2.4 ± 1.0** | 2.3 ± 1.0** | 2.4 ± 1.0** | 2.3 ± 1.1** |
|                                         | Placebo | 94 | 2.8 ± 1.1 | 2.4 ± 1.0** | 2.5 ± 1.0** | 2.5 ± 1.1** | 2.4 ± 1.0** |
| Aqueous secretion                       | LH2171  | 93 | 1.8 ± 0.6 | 1.7 ± 0.7   | 1.5 ± 0.7** | 1.7 ± 0.7   | 1.6 ± 0.7*  |
|                                         | Placebo | 94 | 1.7 ± 0.6 | 1.7 ± 0.7   | 1.4 ± 0.6** | 1.7 ± 0.6   | 1.6 ± 0.7   |
| Character of nasal mucus                | LH2171  | 93 | 2.7 ± 1.4 | 2.4 ± 1.5*  | 2.1 ± 1.4** | 2.7 ± 1.5   | 2.3 ± 1.4*  |
|                                         | Placebo | 94 | 2.6 ± 1.4 | 2.3 ± 1.4   | 2.1 ± 1.4*  | 2.8 ± 1.5   | 2.3 ± 1.4   |

The symptom score was rated by the physician using a 5-point scale: 0, no symptoms; 1, mild; 2, moderate; 3, severe; 4, most severe. Data are expressed as the mean  $\pm$  standard deviation. \*p < 0.05, \*\*p < 0.01 compare to 0 week by the Wilcoxon signed rank test.

Table S4. POMS 2 scores indicating psychological state (T score).

| Items                       | Group   | n  | 0 week          | 8 week           | 16 week           |
|-----------------------------|---------|----|-----------------|------------------|-------------------|
| Anger - Hostility           | LH2171  | 93 | 44.5 $\pm$ 7.7  | 44.9 $\pm$ 6.3   | 45.6 $\pm$ 7.9    |
|                             | Placebo | 94 | 44.8 $\pm$ 7.2  | 46.3 $\pm$ 8.6*  | 45.6 $\pm$ 7.1    |
| Confusion -<br>Bewilderment | LH2171  | 93 | 47.1 $\pm$ 9.0  | 47.8 $\pm$ 8.8   | 47.4 $\pm$ 8.5    |
|                             | Placebo | 94 | 48.1 $\pm$ 9.0  | 48.2 $\pm$ 8.2   | 47.0 $\pm$ 7.7    |
| Depression - Dejection      | LH2171  | 93 | 46.4 $\pm$ 6.7  | 46.9 $\pm$ 7.6   | 47.0 $\pm$ 7.1    |
|                             | Placebo | 94 | 46.6 $\pm$ 7.2  | 47.2 $\pm$ 7.8   | 47.0 $\pm$ 7.0    |
| Fatigue - Inertia           | LH2171  | 93 | 46.9 $\pm$ 8.0  | 47.4 $\pm$ 8.4   | 46.0 $\pm$ 8.0    |
|                             | Placebo | 94 | 47.6 $\pm$ 8.9  | 47.1 $\pm$ 8.5   | 46.5 $\pm$ 9.2    |
| Tension - Anxiety           | LH2171  | 93 | 45.6 $\pm$ 7.7  | 47.9 $\pm$ 8.5** | 46.8 $\pm$ 7.4    |
|                             | Placebo | 94 | 46.5 $\pm$ 8.5  | 48.6 $\pm$ 8.4** | 47.6 $\pm$ 8.4*   |
| Vigor - Activity            | LH2171  | 93 | 50.5 $\pm$ 9.9  | 49.6 $\pm$ 10.3  | 48.7 $\pm$ 10.0** |
|                             | Placebo | 94 | 51.2 $\pm$ 8.3  | 49.8 $\pm$ 8.4*  | 50.6 $\pm$ 8.1    |
| Friendliness                | LH2171  | 93 | 51.5 $\pm$ 10.2 | 50.4 $\pm$ 10.6  | 50.0 $\pm$ 10.6*  |
|                             | Placebo | 94 | 51.4 $\pm$ 7.9  | 51.2 $\pm$ 9.0   | 50.8 $\pm$ 8.0    |
| Total Mood Disturbance      | LH2171  | 93 | 45.8 $\pm$ 8.1  | 46.8 $\pm$ 7.9*  | 46.7 $\pm$ 7.8    |
|                             | Placebo | 94 | 46.2 $\pm$ 7.7  | 47.3 $\pm$ 7.8   | 46.4 $\pm$ 7.4    |

Mean  $\pm$  standard deviation. \*p < 0.05, \*\*p < 0.01 compared to 0 week by the Wilcoxon signed rank test.
